# Supplementary material for: Ni/Ag bimetallic nanoparticle-engineered Ti 3 C 2 T x MXene composite as a SERS substrate for trace detection of thiram pesticide
Source: Royal Society of Chemistry journal article supplement (doi:10.1039/d5ay01695a), 2025-01-01
Supplement: d5ay01695a1.pdf [file d5ay01695a1.pdf]

# **Ni/Ag bimetallic nanoparticles-engineered $\text{Ti}_3\text{C}_2\text{T}_x$ MXene composite as SERS substrate for trace detection of thiram pesticide**

Jinping Tang,<sup>ab</sup> Yuhai Wang,<sup>a</sup> Chunxu Wang,<sup>a</sup> Ziwei Yu,<sup>a</sup> and Jin Wang,<sup>\*ab</sup>

<sup>a</sup> College of Information Technology, Jilin Engineering Research Center of Optoelectronic Materials and Devices, Jilin Normal University, Siping 136000, China.

<sup>b</sup> Jilin Provincial Key Laboratory of Wide Bandgap Semiconductor Material Growth and Device Applications, Jilin Normal University, Changchun 130103, China

## **Corresponding Authors**

\* Correspondence: Jin Wang ([jwang@jlnu.edu.cn](mailto:jwang@jlnu.edu.cn))

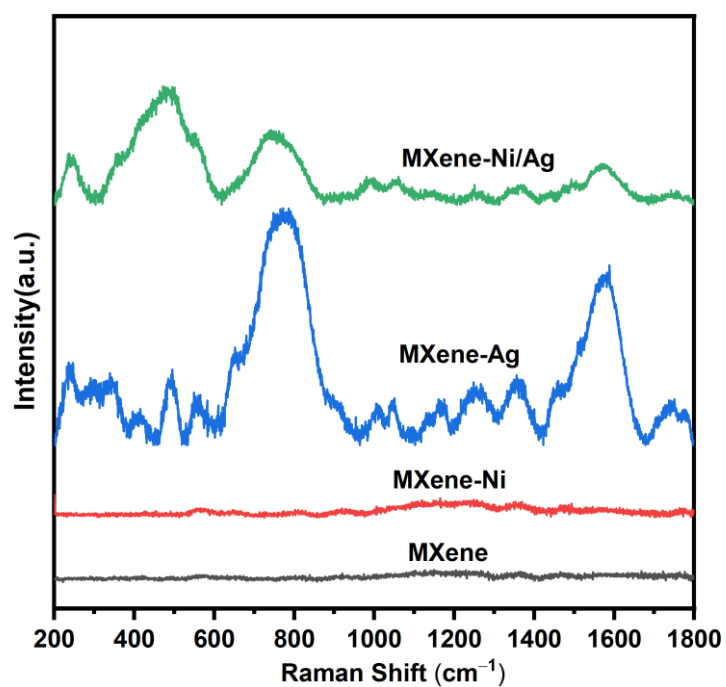

**Figure S1.** Intrinsic Raman spectra of different SERS substrates.

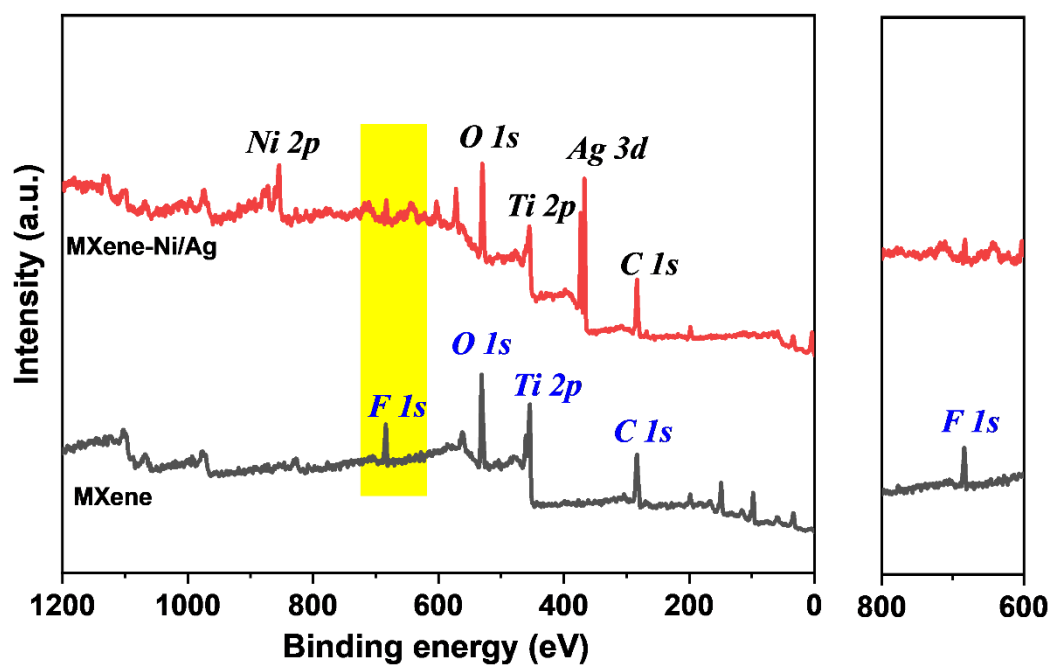

**Figure S2.** The XPS of the F 1s comparison spectra between the original MXene sample and MXene Ni/Ag.

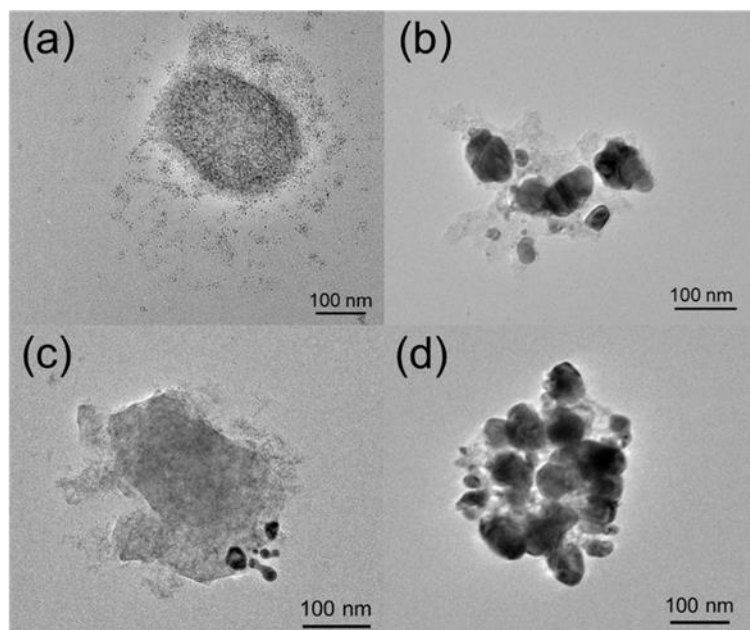

**Figure S3.** TEM image of MXene-Ni (a), MXene-Ag (b), MXene-Ni/Ag=1:1 (c) and MXene-Ni/Ag=1:4 composite (d).

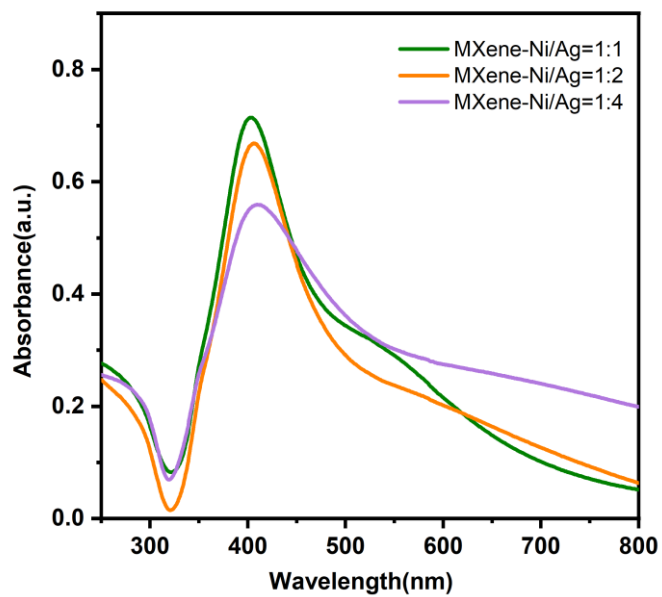

**Figure S4.** UV-vis absorbance spectra of MXene-Ni/Ag composite substrates with different Ni-Ag ratios.

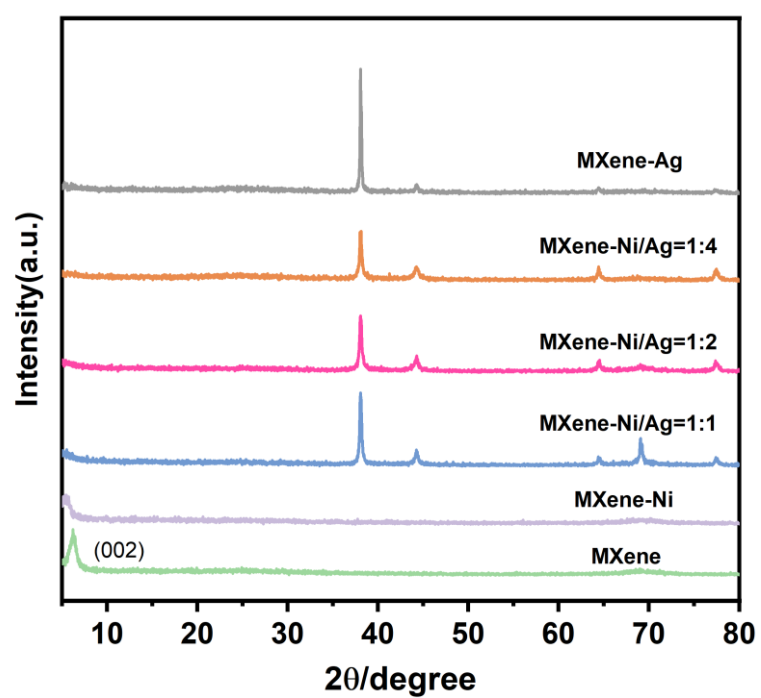

**Figure S5.** XRD spectra of MXene, MXene-Ni, MXene-Ag, and MXene-Ni/Ag composite substrates with different Ni-Ag ratios.

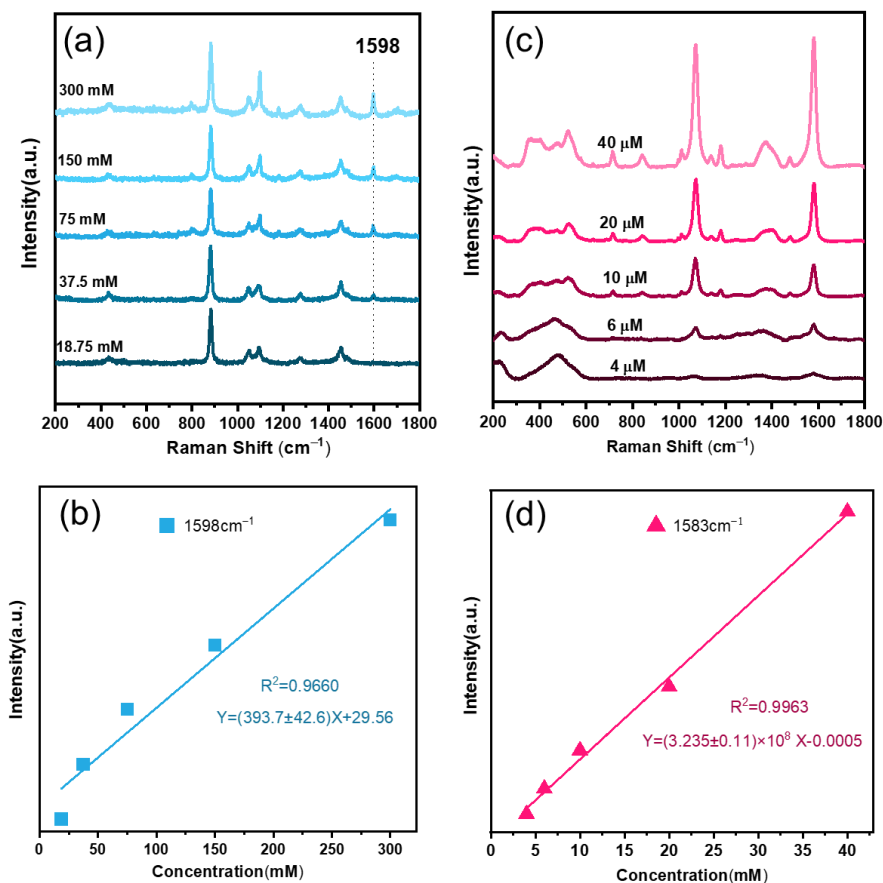

**Figure S6.** MBA concentration-dependent normal Raman spectra (a) and Raman intensities at 1598 cm<sup>-1</sup> (b), MBA concentration-dependent SERS spectra (c) and Raman intensities at 1583 cm<sup>-1</sup> (d).

The Calculation of SERS Performance Factor (*SPF*)<sup>[1]</sup>.

$$SPF = \frac{\Delta I_{SERS}}{\Delta C_{SERS}} / \frac{\Delta I_{Raman}}{\Delta C_{Raman}}$$

$\frac{\Delta I_{Raman}}{\Delta C_{Raman}}$  : **Normal Raman Measurement.** Figure S6a showed the MBA concentration-

dependent normal Raman spectra in ethanol solution, characteristic Raman peak at 1598 cm<sup>-1</sup> attributed to  $\nu_8$  (ring-breathing vibration) of MBA. By plotting the Raman intensity of the peak against the MBA concentration, a linear relationship ( $R^2 = 0.9660$ )

was obtained as shown in Figure S6b. According to the slope,  $\frac{\Delta I_{Raman}}{\Delta C_{Raman}}$  was

393.7 ± 42.6.

$\frac{\Delta I_{SERS}}{\Delta C_{SERS}}$ : **SERS Measurement.** Figure S6c showed the MBA concentration-dependent

SERS spectra with the MXene-Ni/Ag as the SERS substrate. Due to the strong adsorption of MBA on the Ag NPs surface via the formation of the Ag-S bond, the characteristic Raman peak shifted  $1598\text{cm}^{-1}$  to  $1583\text{cm}^{-1}$ . It can be observed that the Raman intensity of the peak increased with the increased MBA concentration from 4.0

to 40  $\mu\text{M}$  (Figure S6d). Thereby,  $\frac{\Delta I_{SERS}}{\Delta C_{SERS}}$  was obtained as the slope, which was  $(3.235 \pm 0.11) \times 10^8$  for the peaks.

Recalling the aforementioned,  $SPF = \frac{\Delta I_{SERS}}{\Delta C_{SERS}} / \frac{\Delta I_{Raman}}{\Delta C_{Raman}} = 8.2 \times 10^6$ .

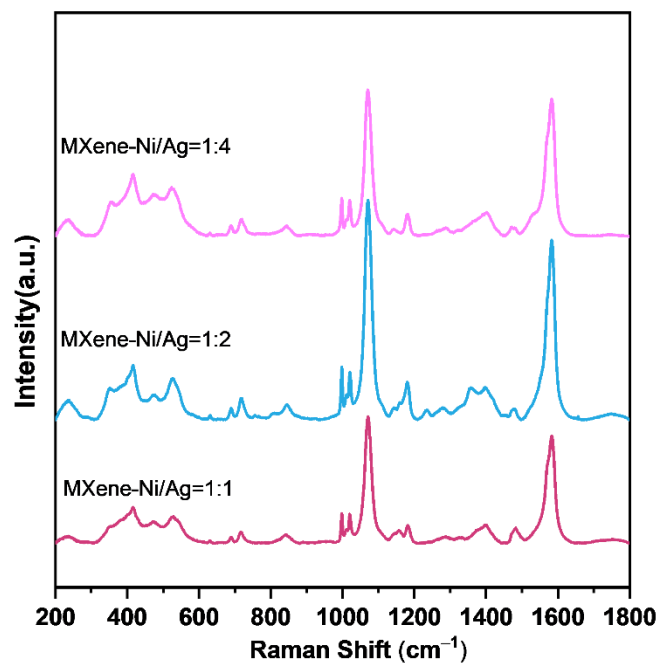

**Figure S7.** SERS spectra of MBA ( $10^{-5}$  M) on MXene-Ni/Ag composite substrates with different Ni:Ag ratios

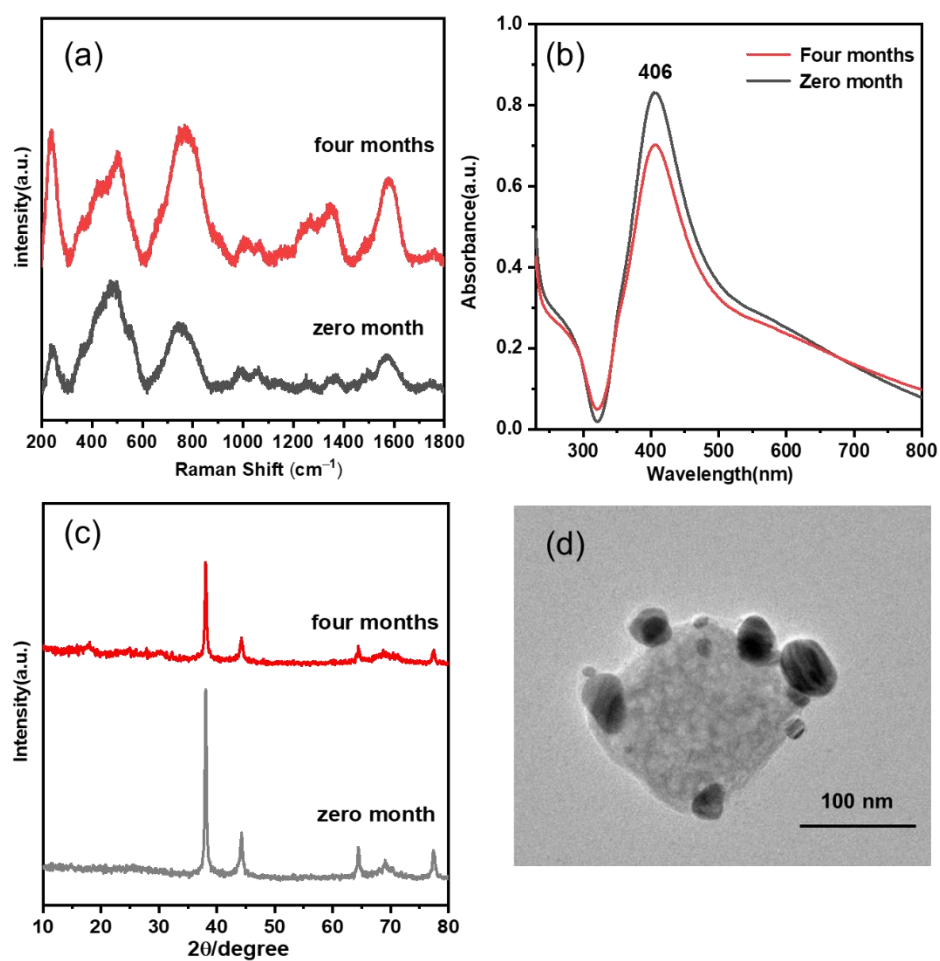

**Figure S8.** Raman (a), UV-vis (b), XRD (c), and TEM image (d) of the MXene-Ni/Ag SERS substrates after four months of storage.



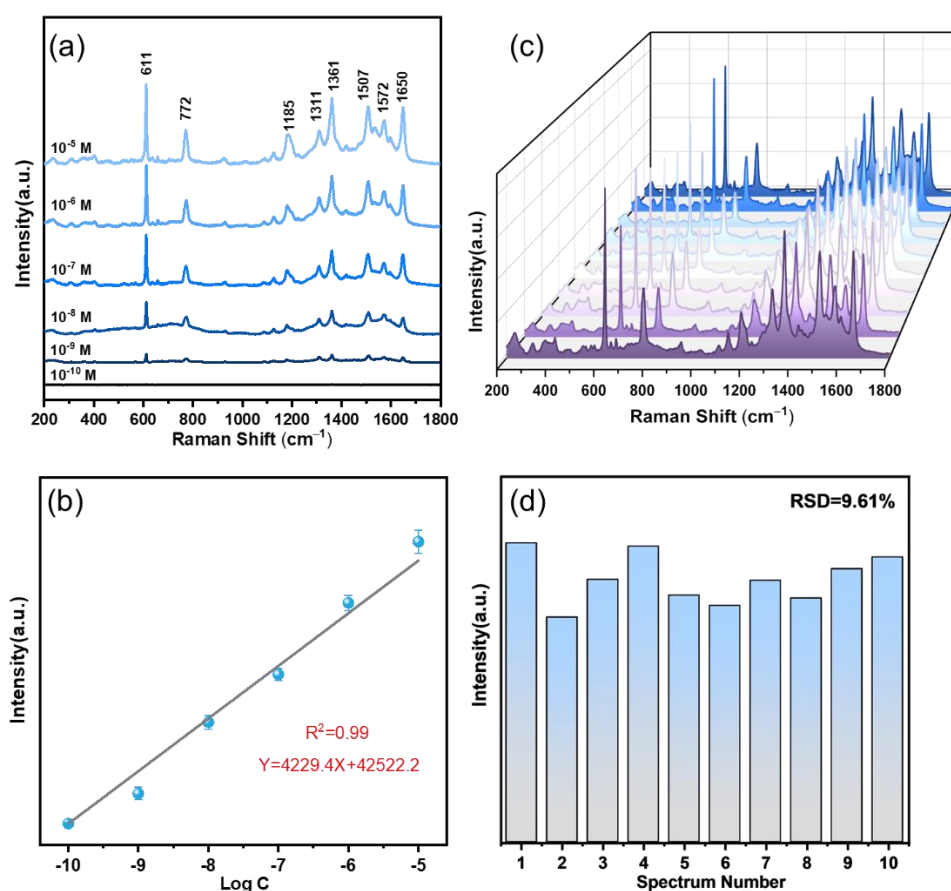

**Figure S9.** (a) SERS spectra of different concentrations of R6G ( $10^{-5}$ ~ $10^{-10}$  M), (b) quantitative analysis of R6G, (c) histogram of R6G concentration and SERS intensity, (d) histogram of SERS intensity distribution at 1361  $\text{cm}^{-1}$ .

The typical Raman “fingerprint” of R6G can be observed as peak at 611 $\text{cm}^{-1}$ , 772  $\text{cm}^{-1}$ , 1361  $\text{cm}^{-1}$  and 1650  $\text{cm}^{-1}$ , corresponding respectively to the following R6G vibration modes: C–C–C stretching vibration, the aromatic stretching vibration, and the out-of-plane vibration of the deformed C–H bond<sup>[2]</sup>. As the concentration of R6G decreased from  $10^{-5}$  M to  $10^{-10}$  M, the Raman intensity gradually decreases, indicating a decreasing number of adsorbed R6G molecules. Notably, even at extremely low concentration of  $10^{-10}$  M, the R6G signal remained detectable and exhibited a good linear relationship (Figure S9a and S9b). Furthermore, the reproducibility of R6G detection on MXene-Ni/Ag composite substrates was also evaluated., and the results were shown in Figure S9c, and the calculated RSD value was 9.61%.

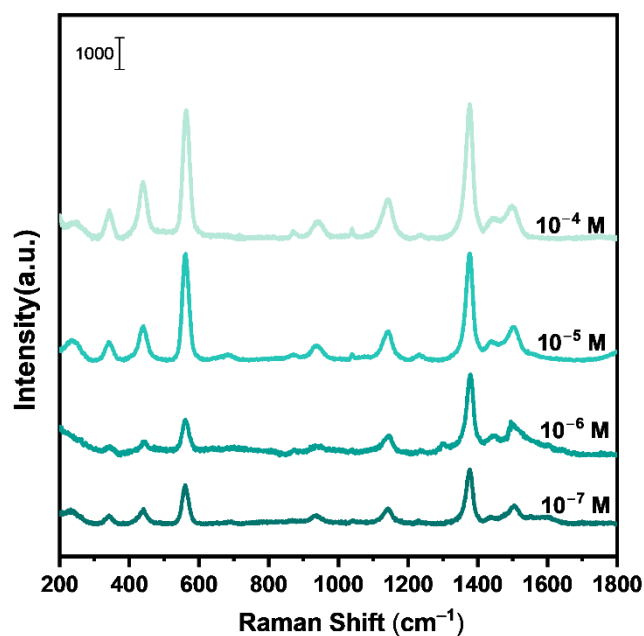

**Figure S10.** SERS spectra of thiram with different concentrations ( $10^{-4}$ ,  $10^{-5}$ ,  $10^{-6}$  and  $10^{-7}$  M) on apple surface.

- [1] Yue X, Yan S, Gao T, Pu S, Tang H, Pei X, Tian Z, Wang X, Ren B, Liu G. SERS Performance Factor: A Convenient Parameter for the Enhancement Evaluation of SERS Substrates[J]. *Analytical Chemistry*, 2024, **96**, 17517–17525.
- [2] Michaels A M, Jiang, Brus L. Ag Nanocrystal Junctions as the Site for Surface-Enhanced Raman Scattering of Single Rhodamine 6G Molecules[J]. *The Journal of Physical Chemistry B*, 2000, **104**, 11965–11971.
